# Supplementary material for: Epilobium Species: From Optimization of the Extraction Process to Evaluation of Biological Properties
Source: MDPI journal article supplement (doi:10.3390/antiox12010091), 2022-12-30
Supplement: s1 [file s1]

**Sample 1 – *E. hirsutum* leaves (EtOH 50%)**

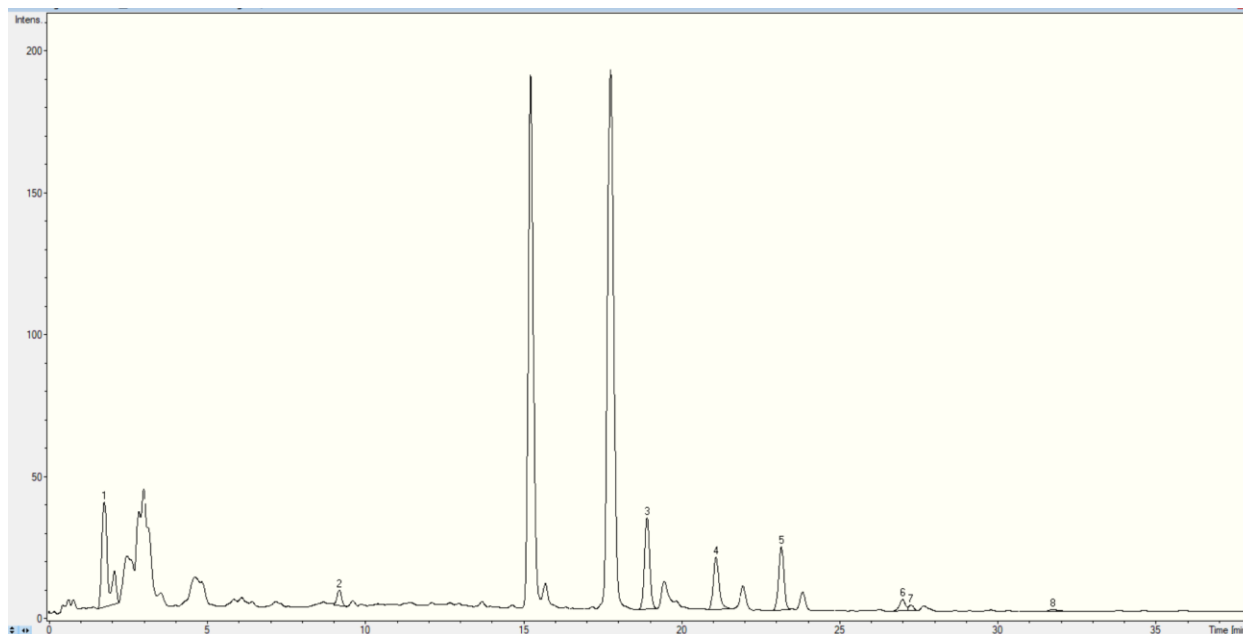

**Figure S1 (A):** The UV chromatogram for the individual polyphenolic compounds quantified by the first LC-MS method

Legend: 1- caftaric acid; 2- *p*-coumaric acid; 3- hyperoside; 4- myricetin; 5- quercitrin; 6- quercetol; 7- kaempferol-3-rhamnoside; 8- kaempferol.

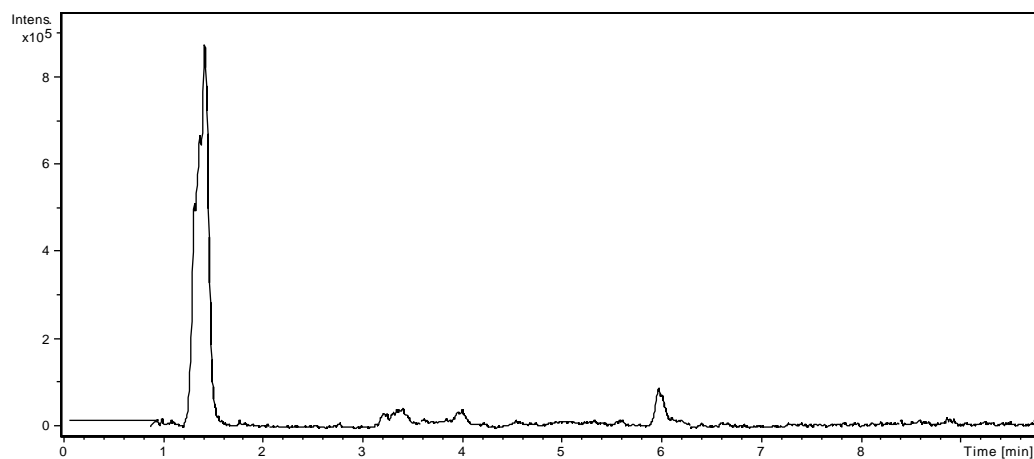

**Figure S1 (B):** The total ion chromatogram (TIC) for polyphenols analyzed with the second analytical method (Gallic acid –  $R_T=1.5$  min; Protocatechuic acid –  $R_T=2.8$  min; Catechin –  $R_T=6.0$  min; Vanilic acid –  $R_T=6.7$  min; Syringic acid –  $R_T=8.4$  min; Epicatechin –  $R_T=9.0$  min)

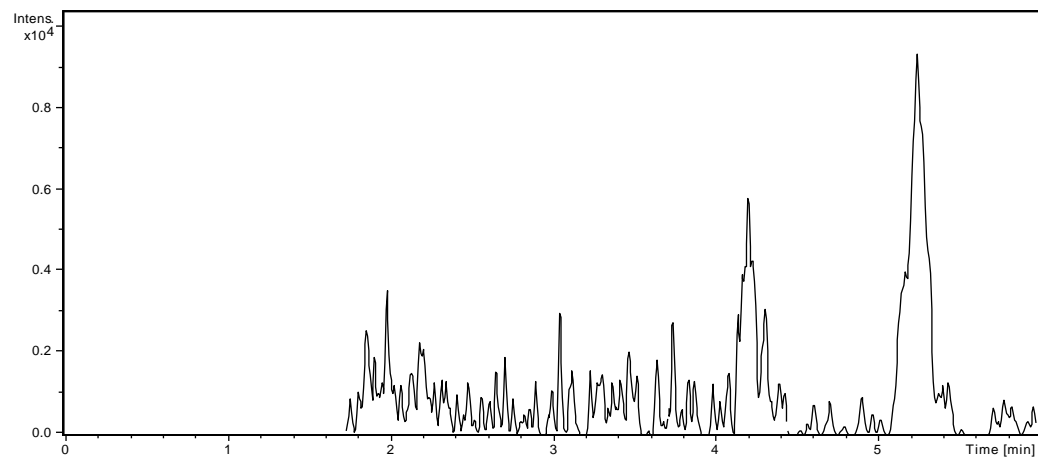

**Figure S1 (C):** The TIC for tocopherols ( $\delta$ -tocopherol –  $R_T=3.3$  min;  $\gamma$ -tocopherol –  $R_T=4.1$  min;  $\alpha$ -tocopherol –  $R_T=5.1$  min)

**Sample 2 – *E. hirsutum* leaves (EtOH 30%)**

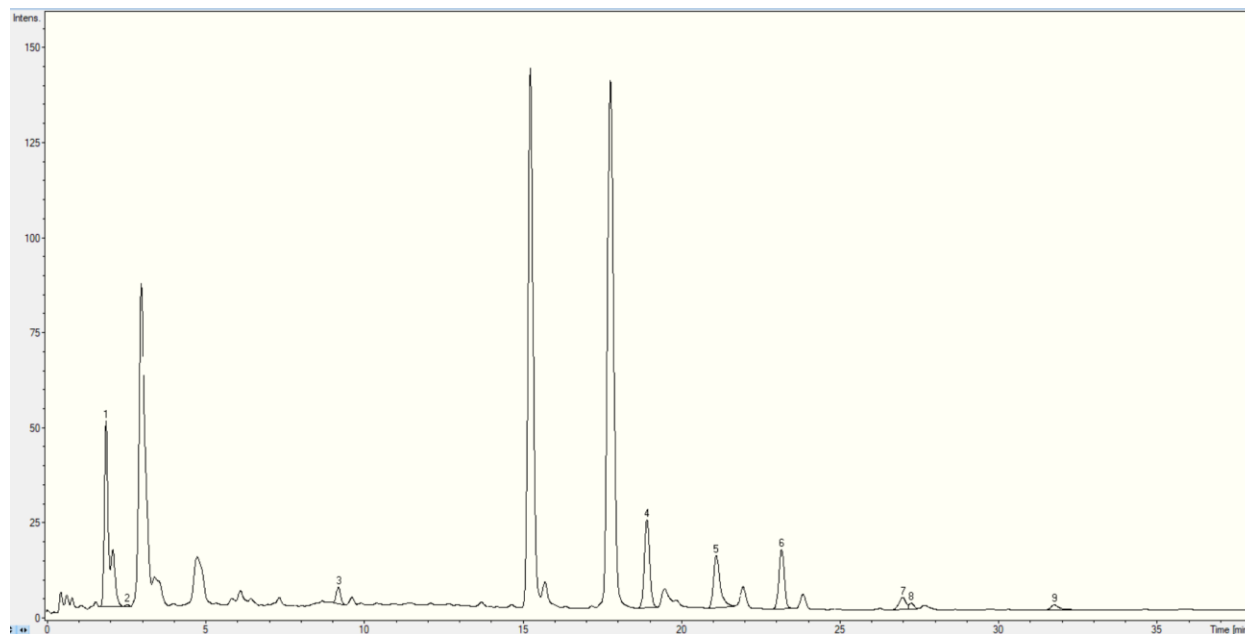

**Figure S2 (A):** The UV chromatogram for the individual polyphenolic compounds quantified by the first LC-MS method

Legend: 1- caftaric acid; 2- gentisic acid; 3- *p*-coumaric acid; 4- hyperoside; 5- myricetin; 6- quercitrin; 7- quercetol; 8- kaempferol-3-rhamnoside; 9- kaempferol.

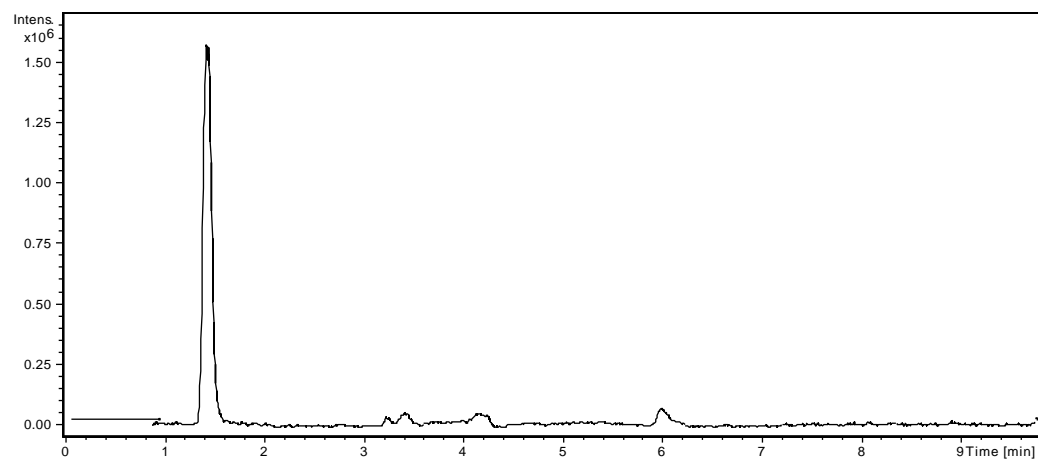

**Figure S2 (B):** The TIC for polyphenols analyzed with the second analytical method (Gallic acid –  $R_T=1.5$  min; Protocatechuic acid –  $R_T=2.8$  min; Catechin –  $R_T=6.0$  min; Vanilic acid –  $R_T=6.7$  min; Syringic acid –  $R_T=8.4$  min; Epicatechin –  $R_T=9.0$  min)

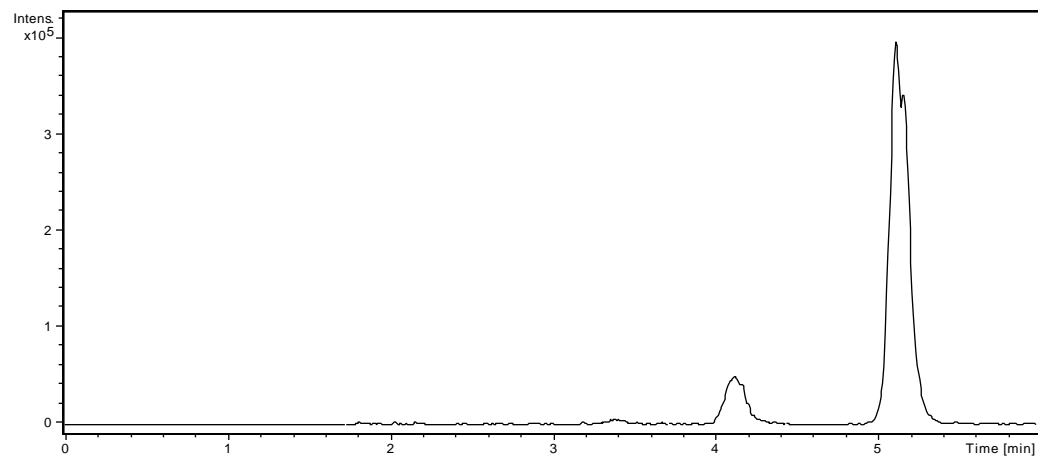

**Figure S2 (C):** TIC for tocopherols ( $\delta$ -tocopherol –  $R_T=3.3$  min;  $\gamma$ -tocopherol –  $R_T=4.1$  min;  $\alpha$ -tocopherol –  $R_T=5.1$  min)

**Sample 3 – *E. hirsutum* aerial parts (EtOH 30%)**

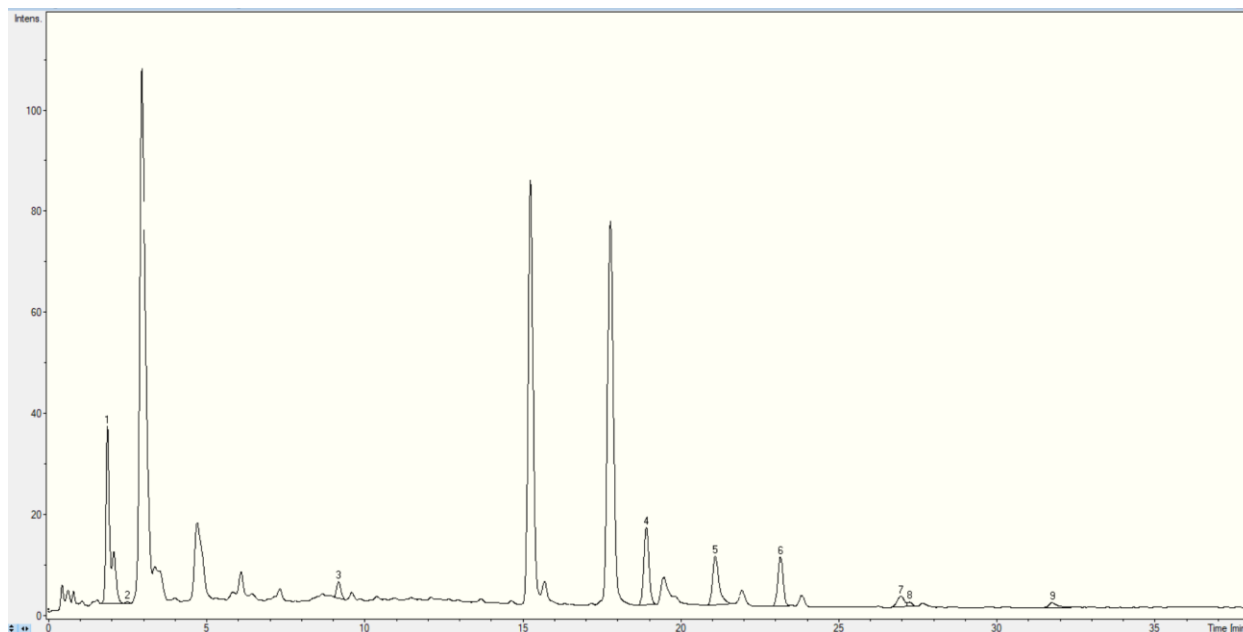

**Figure S3 (A):** The UV chromatogram for the individual polyphenolic compounds quantified by the first LC-MS method

Legend: 1- caftaric acid; 2- gentisic acid; 3- *p*-coumaric acid; 4- hyperoside; 5- myricetin; 6- quercitrin; 7- quercetol; 8- kaempferol-3-rhamnoside; 9- kaempferol.

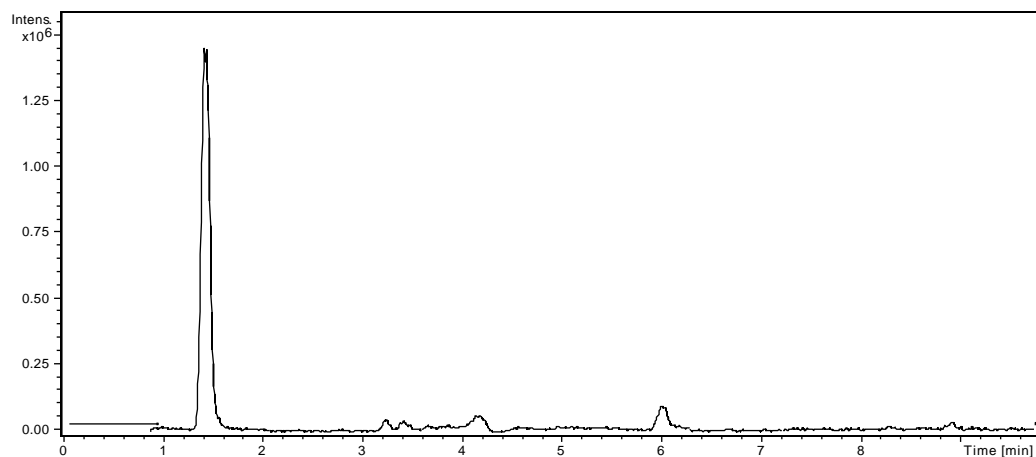

**Figure S3 (B):** The TIC for polyphenols analyzed with the second analytical method (Gallic acid –  $R_T=1.5$  min; Protocatechuic acid –  $R_T=2.8$  min; Catechin –  $R_T=6.0$  min; Vanilic acid –  $R_T=6.7$  min; Syringic acid –  $R_T=8.4$  min; Epicatechin –  $R_T=9.0$  min)

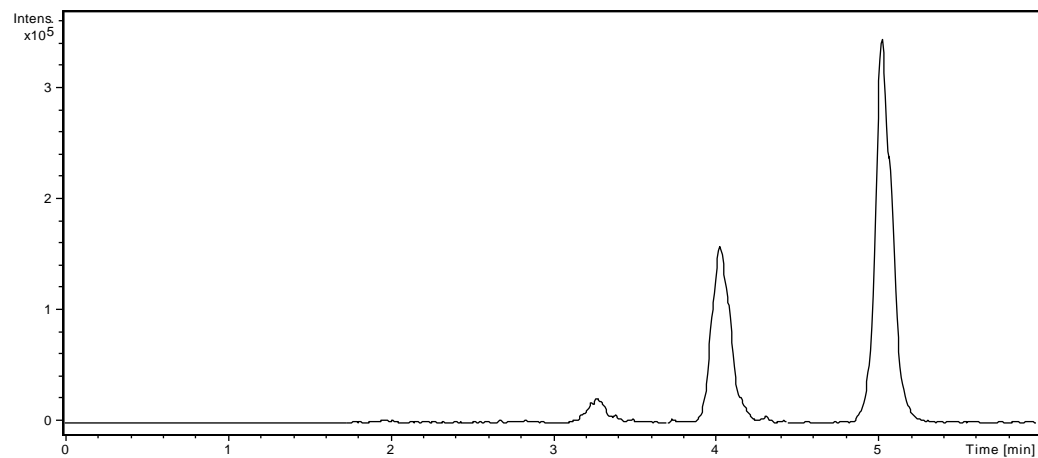

**Figure S3 (C):** TIC for tocopherols ( $\delta$ -tocopherol –  $R_T=3.3$  min;  $\gamma$ -tocopherol –  $R_T=4.1$  min;  $\alpha$ -tocopherol –  $R_T=5.1$  min)

**Sample 4 – *E. hirsutum* roots (EtOH 30%)**

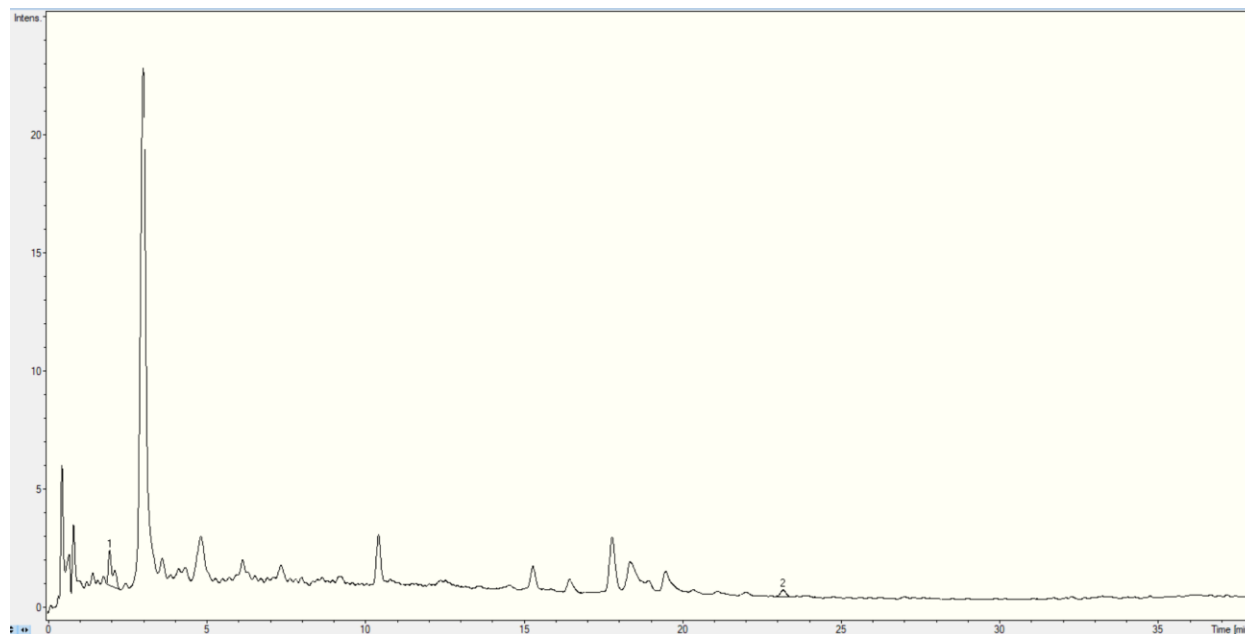

**Figure S4 (A):** The UV chromatogram for the individual polyphenolic compounds quantified by the first LC-MS method

Legend: 1- caftaric acid; 2- quercitrin.

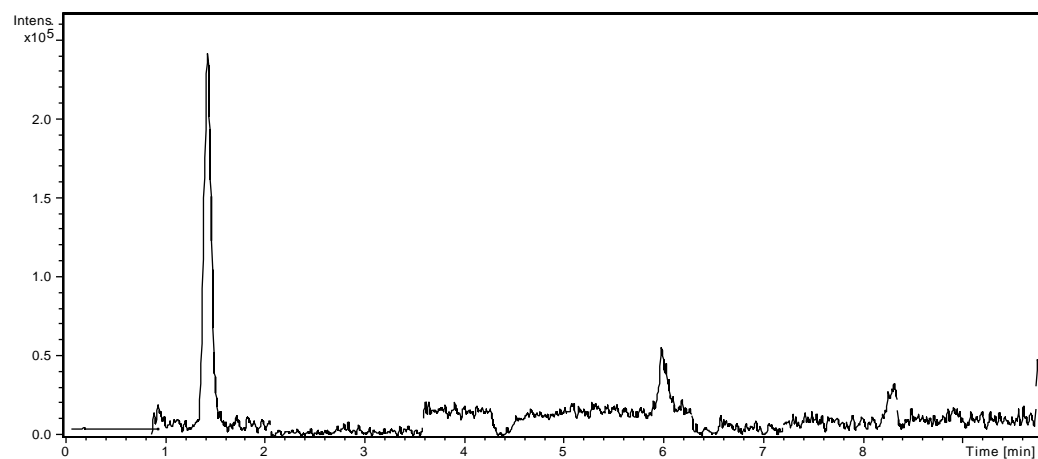

**Figure S4 (B):** The TIC for polyphenols analyzed with the second analytical method (Gallic acid –  $R_T=1.5$  min; Protocatechuic acid –  $R_T=2.8$  min; Catechin –  $R_T=6.0$  min; Vanillic acid –  $R_T=6.7$  min; Syringic acid –  $R_T=8.4$  min; Epicatechin –  $R_T=9.0$  min)

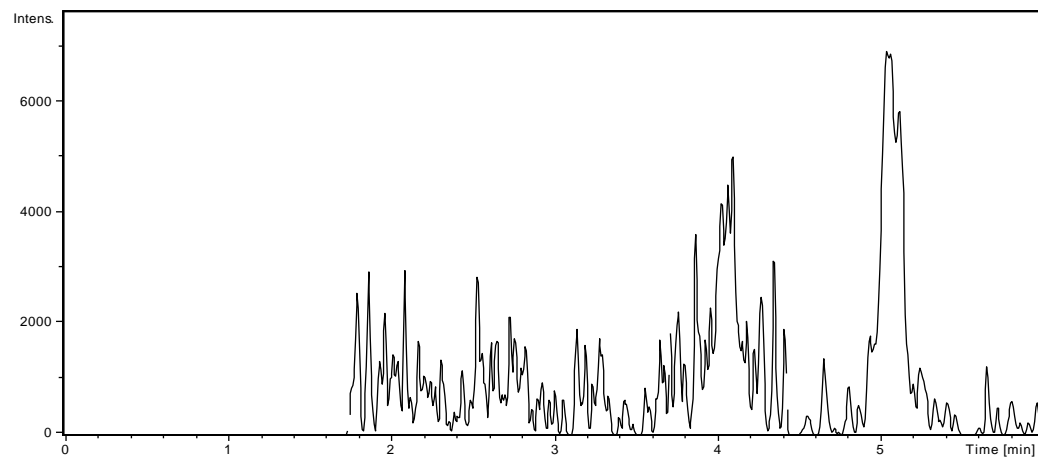

**Figure S4 (C):** TIC for tocopherols ( $\delta$ -tocopherol –  $R_T=3.3$  min;  $\gamma$ -tocopherol –  $R_T=4.1$  min;  $\alpha$ -tocopherol –  $R_T=5.1$  min)



**Sample 5 – *E. parviflorum* aerial parts (EtOH 30%)**

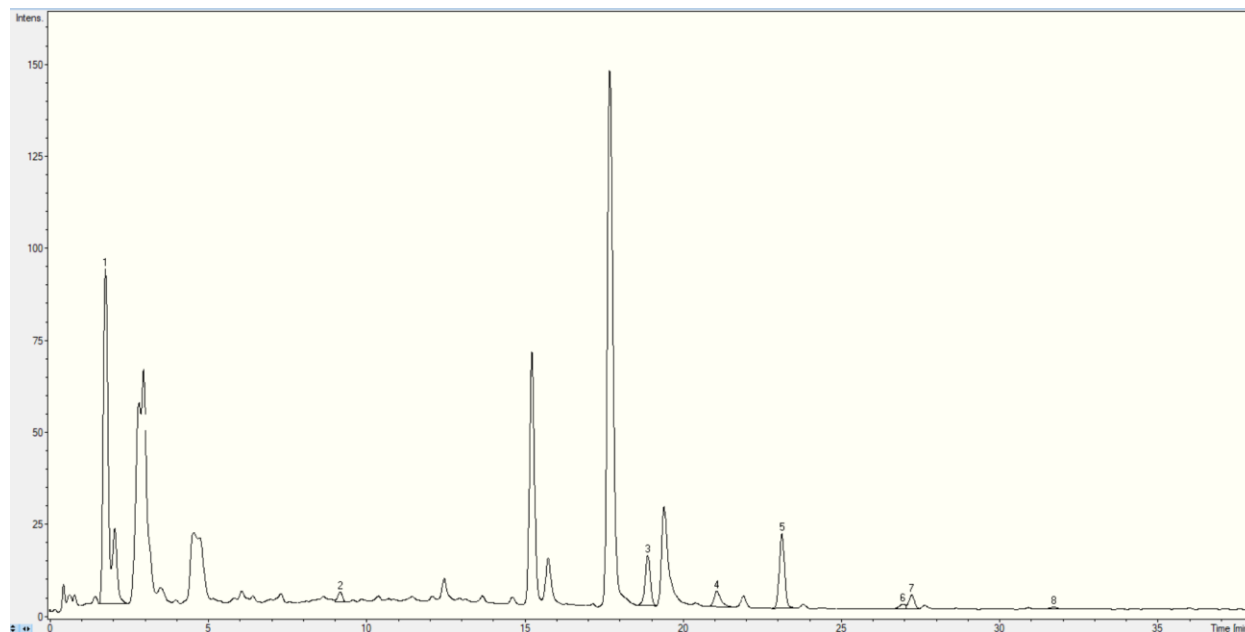

**Figure S5 (A):** The UV chromatogram for the individual polyphenolic compounds quantified by the first LC-MS method

Legend: 1- caftaric acid; 2- *p*-coumaric acid; 3- hyperoside; 4- myricetin; 5- quercitrin; 6- quercetol; 7- kaempferol-3-rhamnoside; 8- kaempferol.

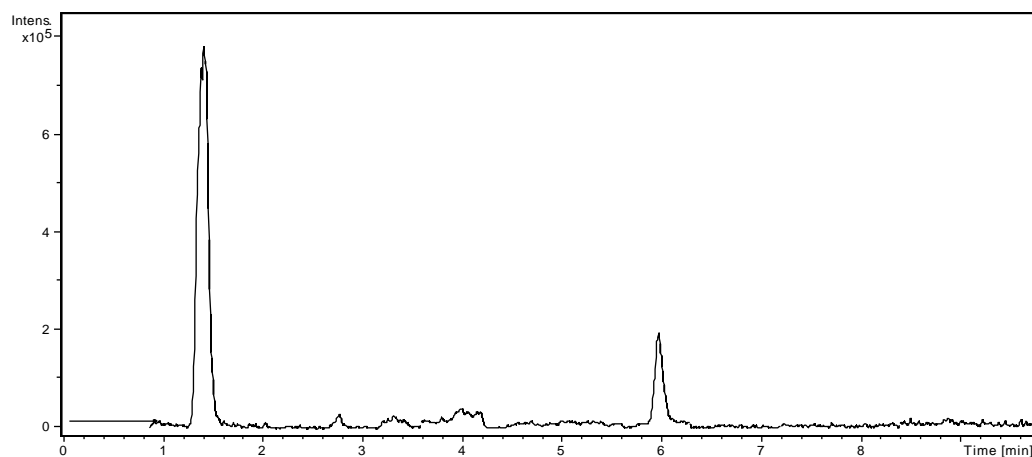

**Figure S5 (B):** The TIC for polyphenols analyzed with the second analytical method (Gallic acid –  $R_T=1.5$  min; Protocatechuic acid –  $R_T=2.8$  min; Catechin –  $R_T=6.0$  min; Vanilic acid –  $R_T=6.7$  min; Syringic acid –  $R_T=8.4$  min; Epicatechin –  $R_T=9.0$  min)

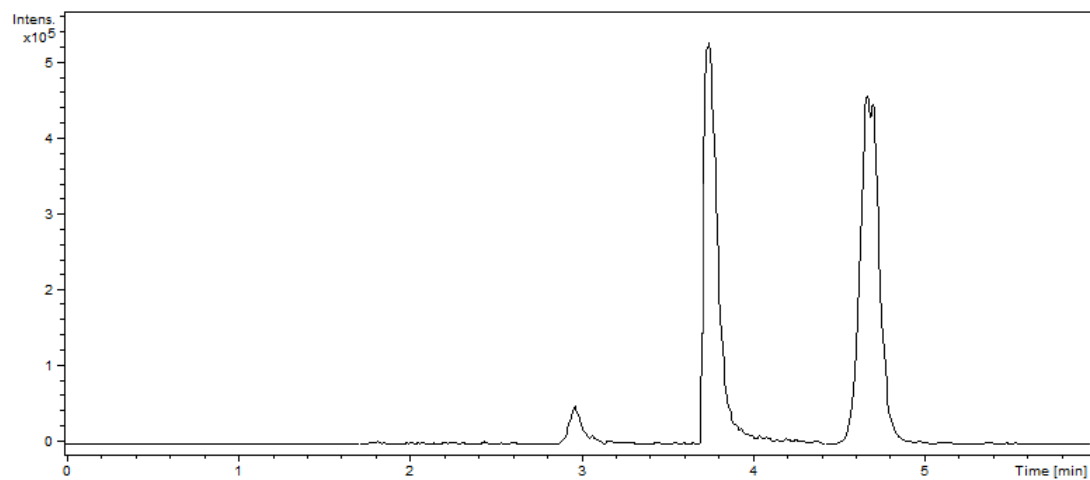

**Figure S5 (C):** TIC for tocopherols ( $\delta$ -tocopherol –  $R_T=3.3$  min;  $\gamma$ -tocopherol –  $R_T=4.1$  min;  $\alpha$ -tocopherol –  $R_T=5.1$  min)

**Sample 6 – *E. palustre* aerial parts (EtOH 30%)**

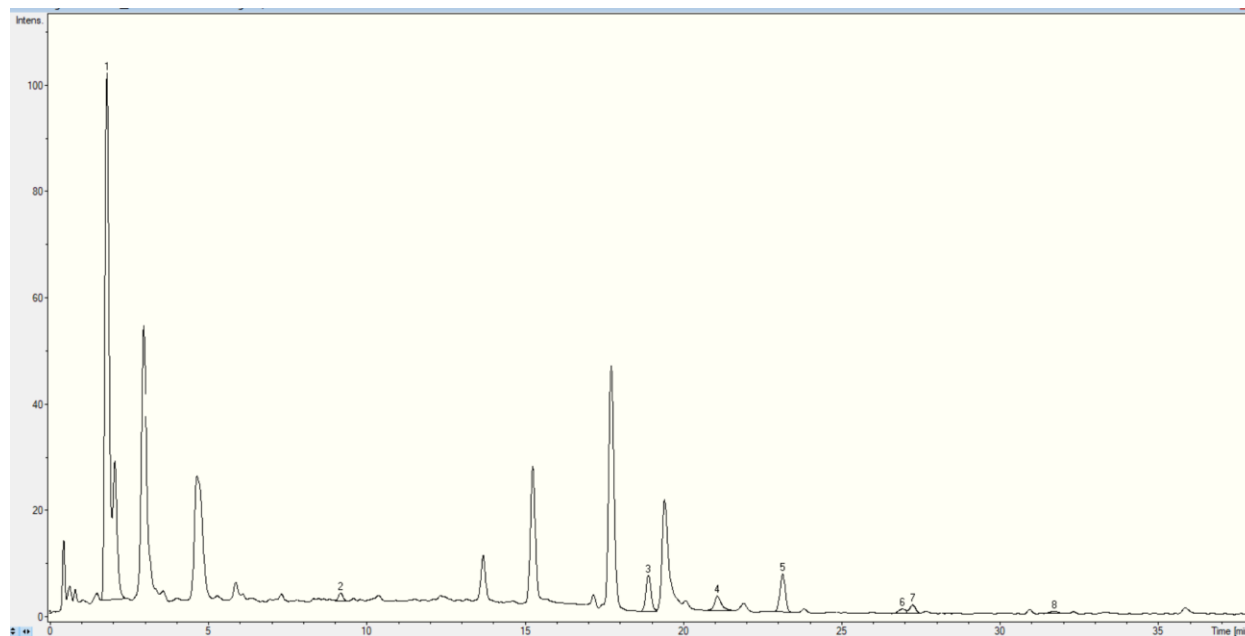

**Figure S6 (A):** The UV chromatogram for the individual polyphenolic compounds quantified by the first LC-MS method

Legend: 1- caftaric acid; 2- *p*-coumaric acid; 3- hyperoside; 4- myricetin; 5- quercitrin; 6- quercetol; 7- kaempferol-3-rhamnoside; 8- kaempferol.

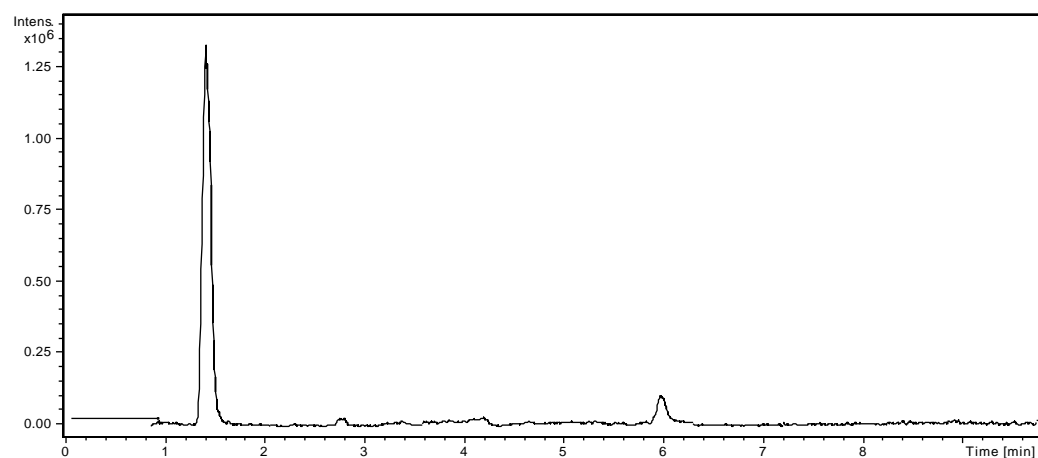

**Figure S6 (B):** The TIC for polyphenols analyzed with the second analytical method (Gallic acid –  $R_T=1.5$  min; Protocatechuic acid –  $R_T=2.8$  min; Catechin –  $R_T=6.0$  min; Vanillic acid –  $R_T=6.7$  min; Syringic acid –  $R_T=8.4$  min; Epicatechin –  $R_T=9.0$  min)

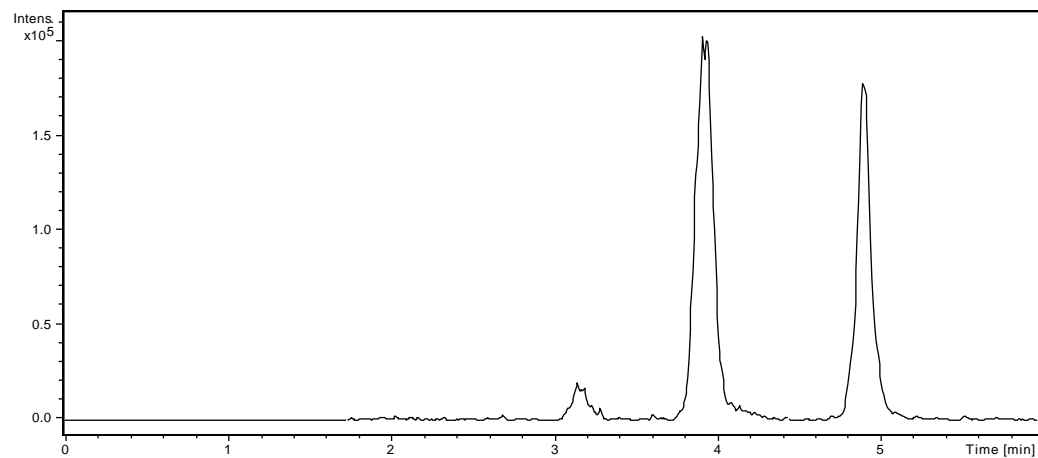

**Figure S6 (C):** TIC for tocopherols ( $\delta$ -tocopherol –  $R_T=3.3$  min;  $\gamma$ -tocopherol –  $R_T=4.1$  min;  $\alpha$ -tocopherol –  $R_T=5.1$  min)

**Sample 7 – *E. dodonaei* aerial parts (EtOH 30%)**

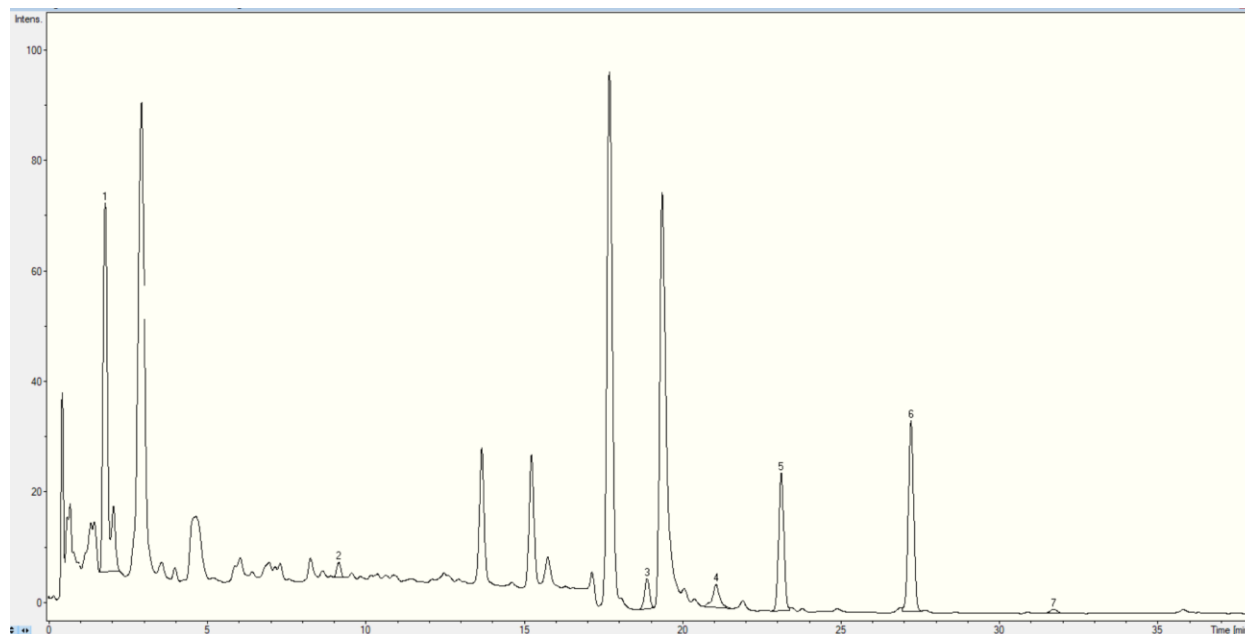

**Figure S7 (A):** The UV chromatogram for the individual polyphenolic compounds quantified by the first LC-MS method

Legend: 1- caftaric acid; 2- *p*-coumaric acid; 3- hyperoside; 4- myricetin; 5- quercitrin; 6- kaempferol-3-rhamnoside; 7- kaempferol.

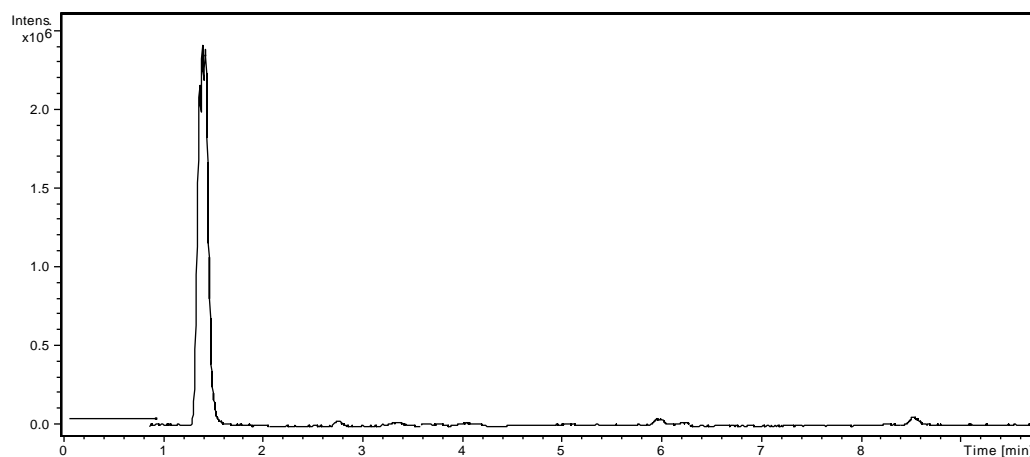

**Figure S7 (B):** The TIC for polyphenols analyzed with the second analytical method (Gallic acid –  $R_T=1.5$  min; Protocatechuic acid –  $R_T=2.8$  min; Catechin –  $R_T=6.0$  min; Vanillic acid –  $R_T=6.7$  min; Syringic acid –  $R_T=8.4$  min; Epicatechin –  $R_T=9.0$  min)

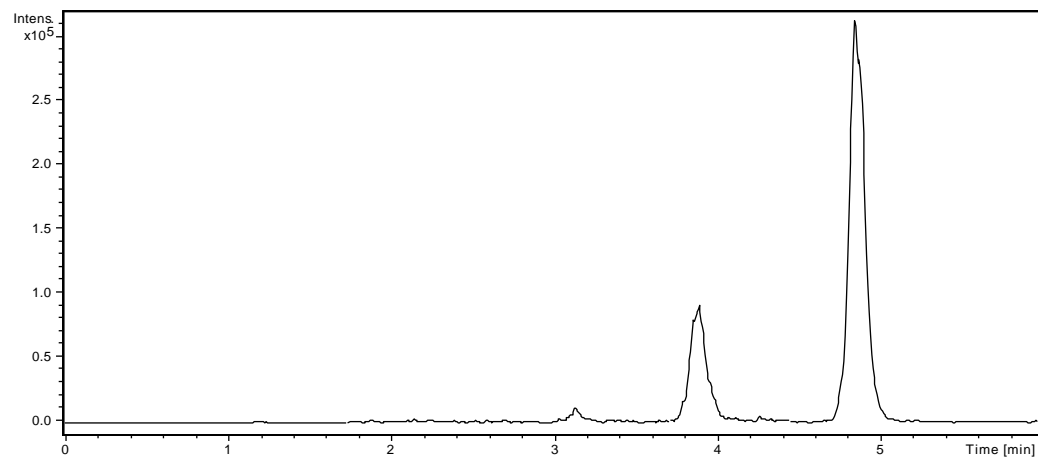

**Figure S7 (C):** TIC for tocopherols ( $\delta$ -tocopherol –  $R_T=3.3$  min;  $\gamma$ -tocopherol –  $R_T=4.1$  min;  $\alpha$ -tocopherol –  $R_T=5.1$  min)

**Sample 8 – *E. angustifolium* leaves (EtOH 30%)**

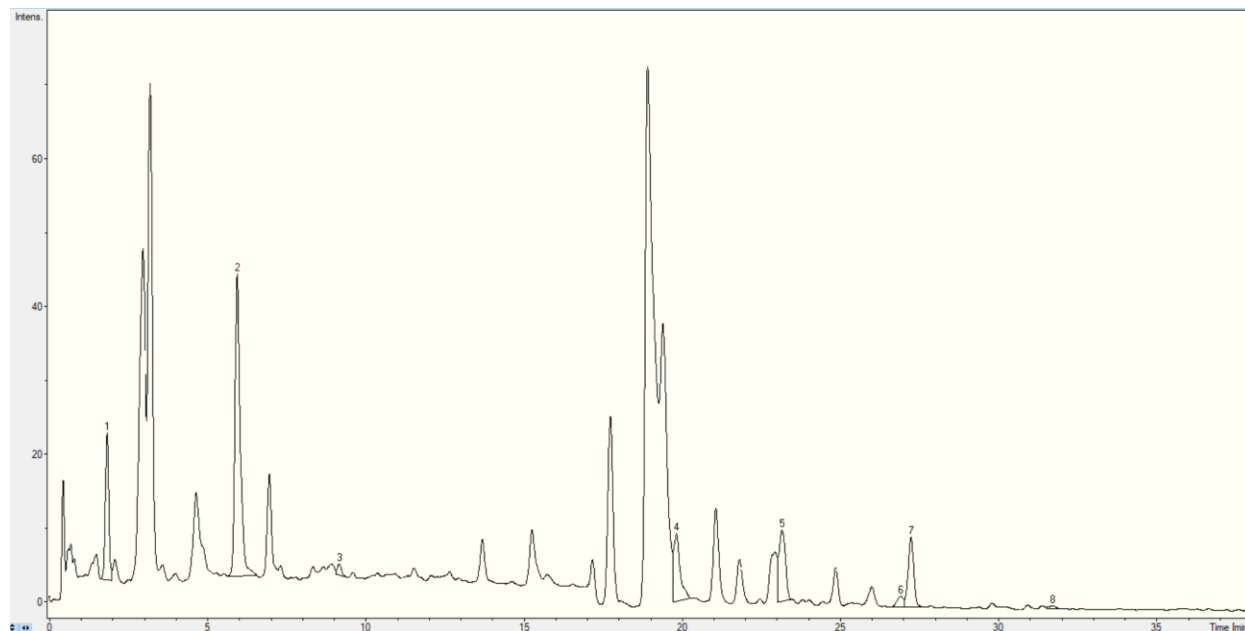

**Figure S8 (A):** The UV chromatogram for the individual polyphenolic compounds quantified by the first LC-MS method

Legend: 1- caftaric acid; 2- chlorogenic acid; 3- *p*-coumaric acid; 4- isoquercitrin; 5- quercitrin; 6- quercetol; 7- kaempferol-3-rhamnoside; 8- kaempferol.

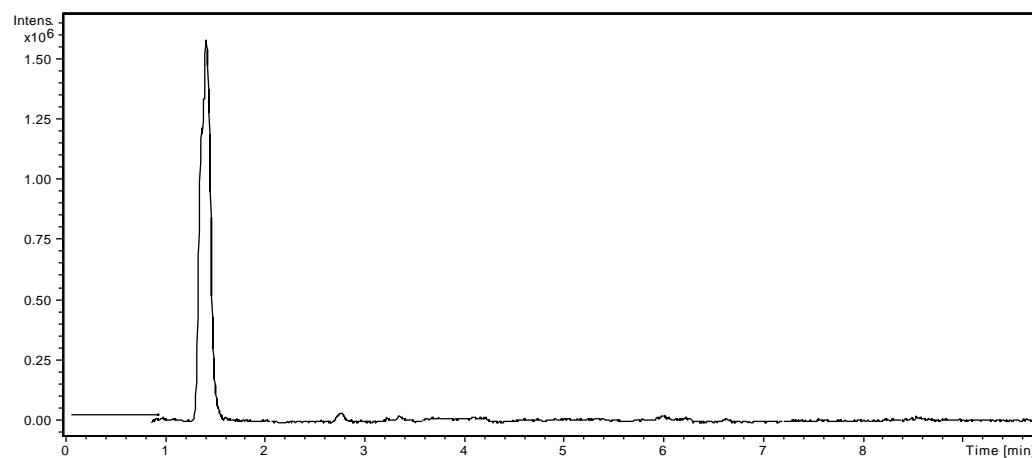

**Figure S8 (B):** The TIC for polyphenols analyzed with the second analytical method (Gallic acid –  $R_T$ =1.5 min; Protocatechuic acid –  $R_T$ =2.8 min; Catechin –  $R_T$ =6.0 min; Vanillic acid –  $R_T$ =6.7 min; Syringic acid –  $R_T$ =8.4 min; Epicatechin –  $R_T$ =9.0 min)

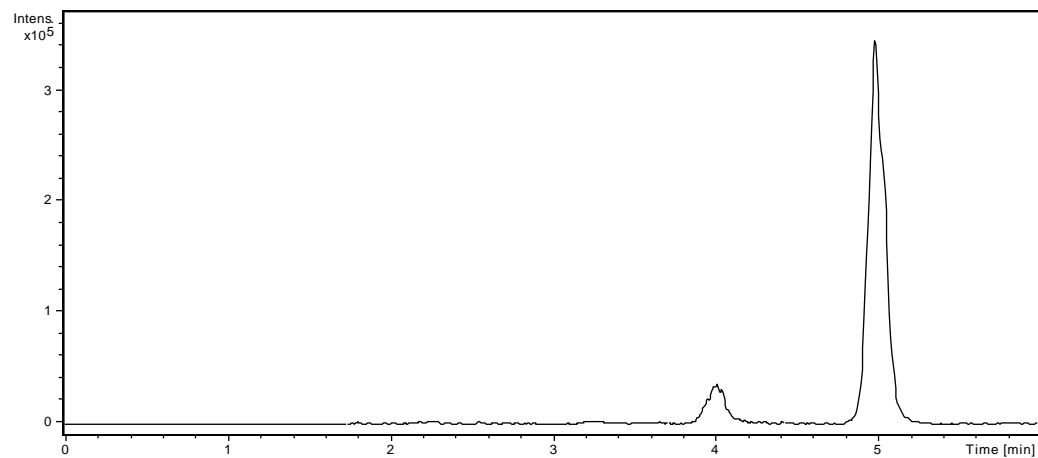

**Figure S8 (C):** TIC for tocopherols ( $\delta$ -tocopherol –  $R_T=3.3$  min;  $\gamma$ -tocopherol –  $R_T=4.1$  min;  $\alpha$ -tocopherol –  $R_T=5.1$  min)



**Sample 9 – *E. angustifolium* aerial parts (EtOH 30%)**

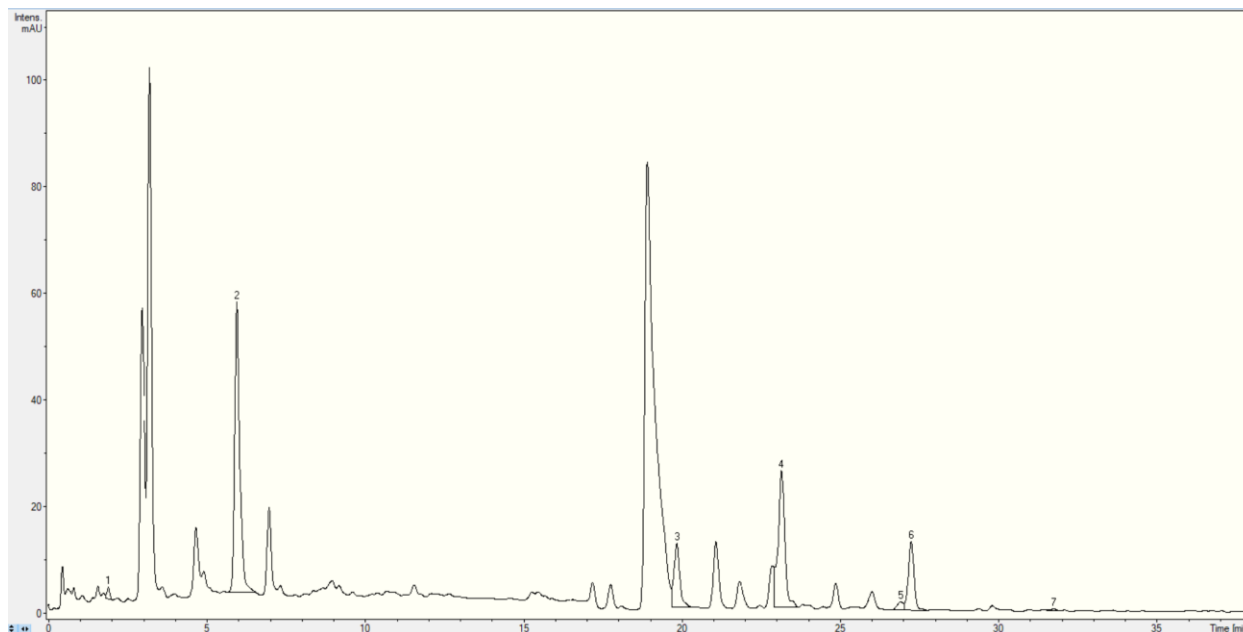

**Figure S9 (A):** The UV chromatogram for the individual polyphenolic compounds quantified by the first LC-MS method

Legend: 1- caftaric acid; 2- chlorogenic acid; 3- isoquercitrin; 4- quercitrin; 5- quercetol; 6- kaempferol-3-rhamnoside; 7- kaempferol.

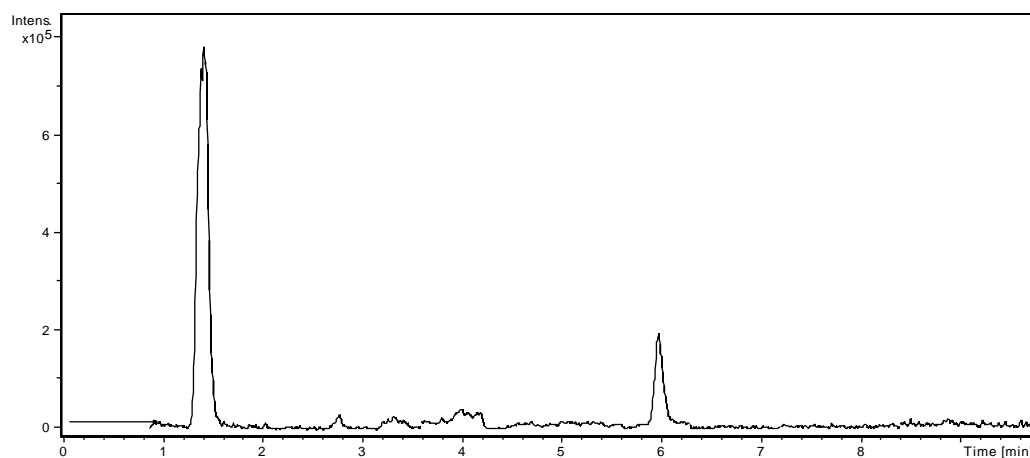

**Figure S9 (B):** The TIC for polyphenols analyzed with the second analytical method (Gallic acid –  $R_T=1.5$  min; Protocatechuic acid –  $R_T=2.8$  min; Catechin –  $R_T=6.0$  min; Vanilic acid –  $R_T=6.7$  min; Syringic acid –  $R_T=8.4$  min; Epicatechin –  $R_T=9.0$  min)

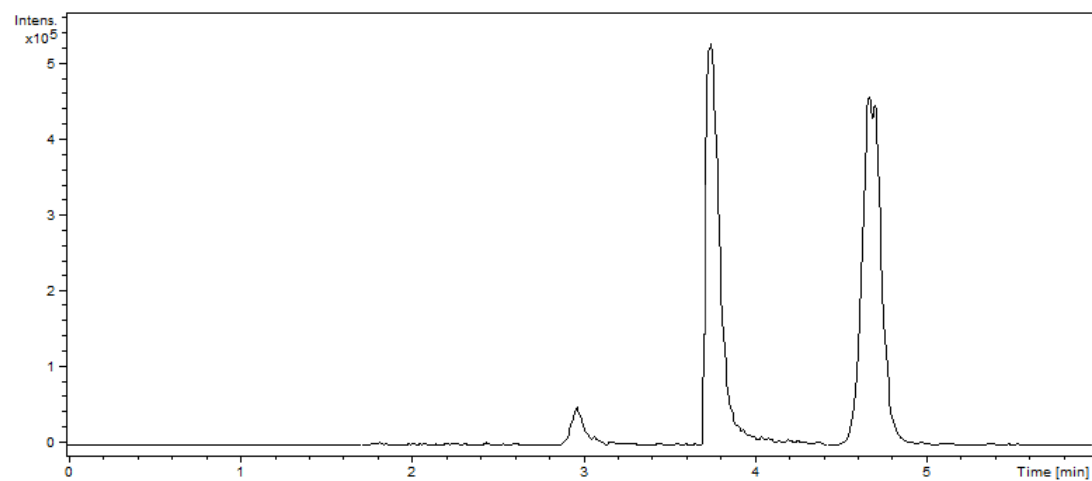

**Figure S9 (C):** TIC for tocopherols ( $\delta$ -tocopherol –  $R_T=3.3$  min;  $\gamma$ -tocopherol –  $R_T=4.1$  min;  $\alpha$ -tocopherol –  $R_T=5.1$  min)
